# Supplementary material for: Hybrid allele-specific ChIP-Seq analysis links variation in transcription factor binding to traits in maize
Source: Research Square preprint supplement (doi:10.21203/rs.3.rs-543958/v1), 2021-06-28
Supplement: Supplementary file 1 [file 6121c831552f0667a027c46a.xlsx]

## Sheet: Sheet1
VP14 fw	TGT CTG GGA TCT TGG TTG
VP14 rev	AAT GTA CAC GCA CCG ATA
DWF4 fw	CGT TTT GAC CGA GAG CAC
DWF4 rev	TAA AAC ACG AGA CCA CAG
MOL1 fw	CTGTGTCCTCCGTGCTCCAT
MOL1 rev	AGGACTCCCGCATCTCCATA
