# Supplementary material for: Hybrid allele-specific ChIP-Seq analysis links variation in transcription factor binding to traits in maize
Source: Research Square preprint supplement (doi:10.21203/rs.3.rs-543958/v1), 2021-06-28
Supplement: Supplementary file 2 [file bded0d78707233a859a34d51.xlsx]

## Sheet: df.methylation_summary (1)
Table S10
window size to determin average methylation (bp)	40
number of ASBs	3297
ASBs with strong bias (>85% to one parent)	1011
ASBs with differential methylation (< 10 and > 70%)	346
ABSs overlapping with motifs	554
ASBs overlap w. motif and methylation variation	53
ASBs overlap w. motif not methylation variation	396
ASBs not overlap motif but methylation variation	293
ASBs overlap neither w. motif or methylation variation	1690
ASBs overlap w. methylation variation and have strong bias	334
ASBs overlap w. motifs and have strong high	154
ASBs overlap w. motif and methylation variation and have strong bias	50
ASBs overlap w. motif not methylation variation and have strong bias	72
ASBs not overlap w. motif but methylation variation and have strong bias	284
ASBs overlap neither w. motif or methylation vairation and have strong bias	315

## Sheet: Sheet1
window size to determin average methylation (bp)	40
number of ASBs	3297
ASBs with strong bias (>85% to one parent)	1011
ASBs with methylation data	2432
ASBs with differential methylation (<10 and > 70%)	346
ABSs overlapping with motifs	554
ASBs overlap w. motif and methylation variation	53
ASBs overlap w. motif not methylation variation	396
ASBs not overlap motif but methylation variation	293
ASBs overlap neither w. motif or methylation variation	1690
ASBs overlap w. methylation variation andhave strong bias	334
ASBs overlap w. motifs and have strong high	154
ASBs overlap w. motif and methylation variation and have strong bias	50
ASBs overlap w. motif not methylation variation and have strong bias	72
ASBs not overlap w. motif but methylation variation and have strong bias	284
ASBs overlap neither w. motif or methylation vairation and have strong bias	315
