# Supplementary figures and images for: Hybrid allele-specific ChIP-Seq analysis links variation in transcription factor binding to traits in maize
Source: Research Square preprint supplement (doi:10.21203/rs.3.rs-543958/v1), 2021-06-28

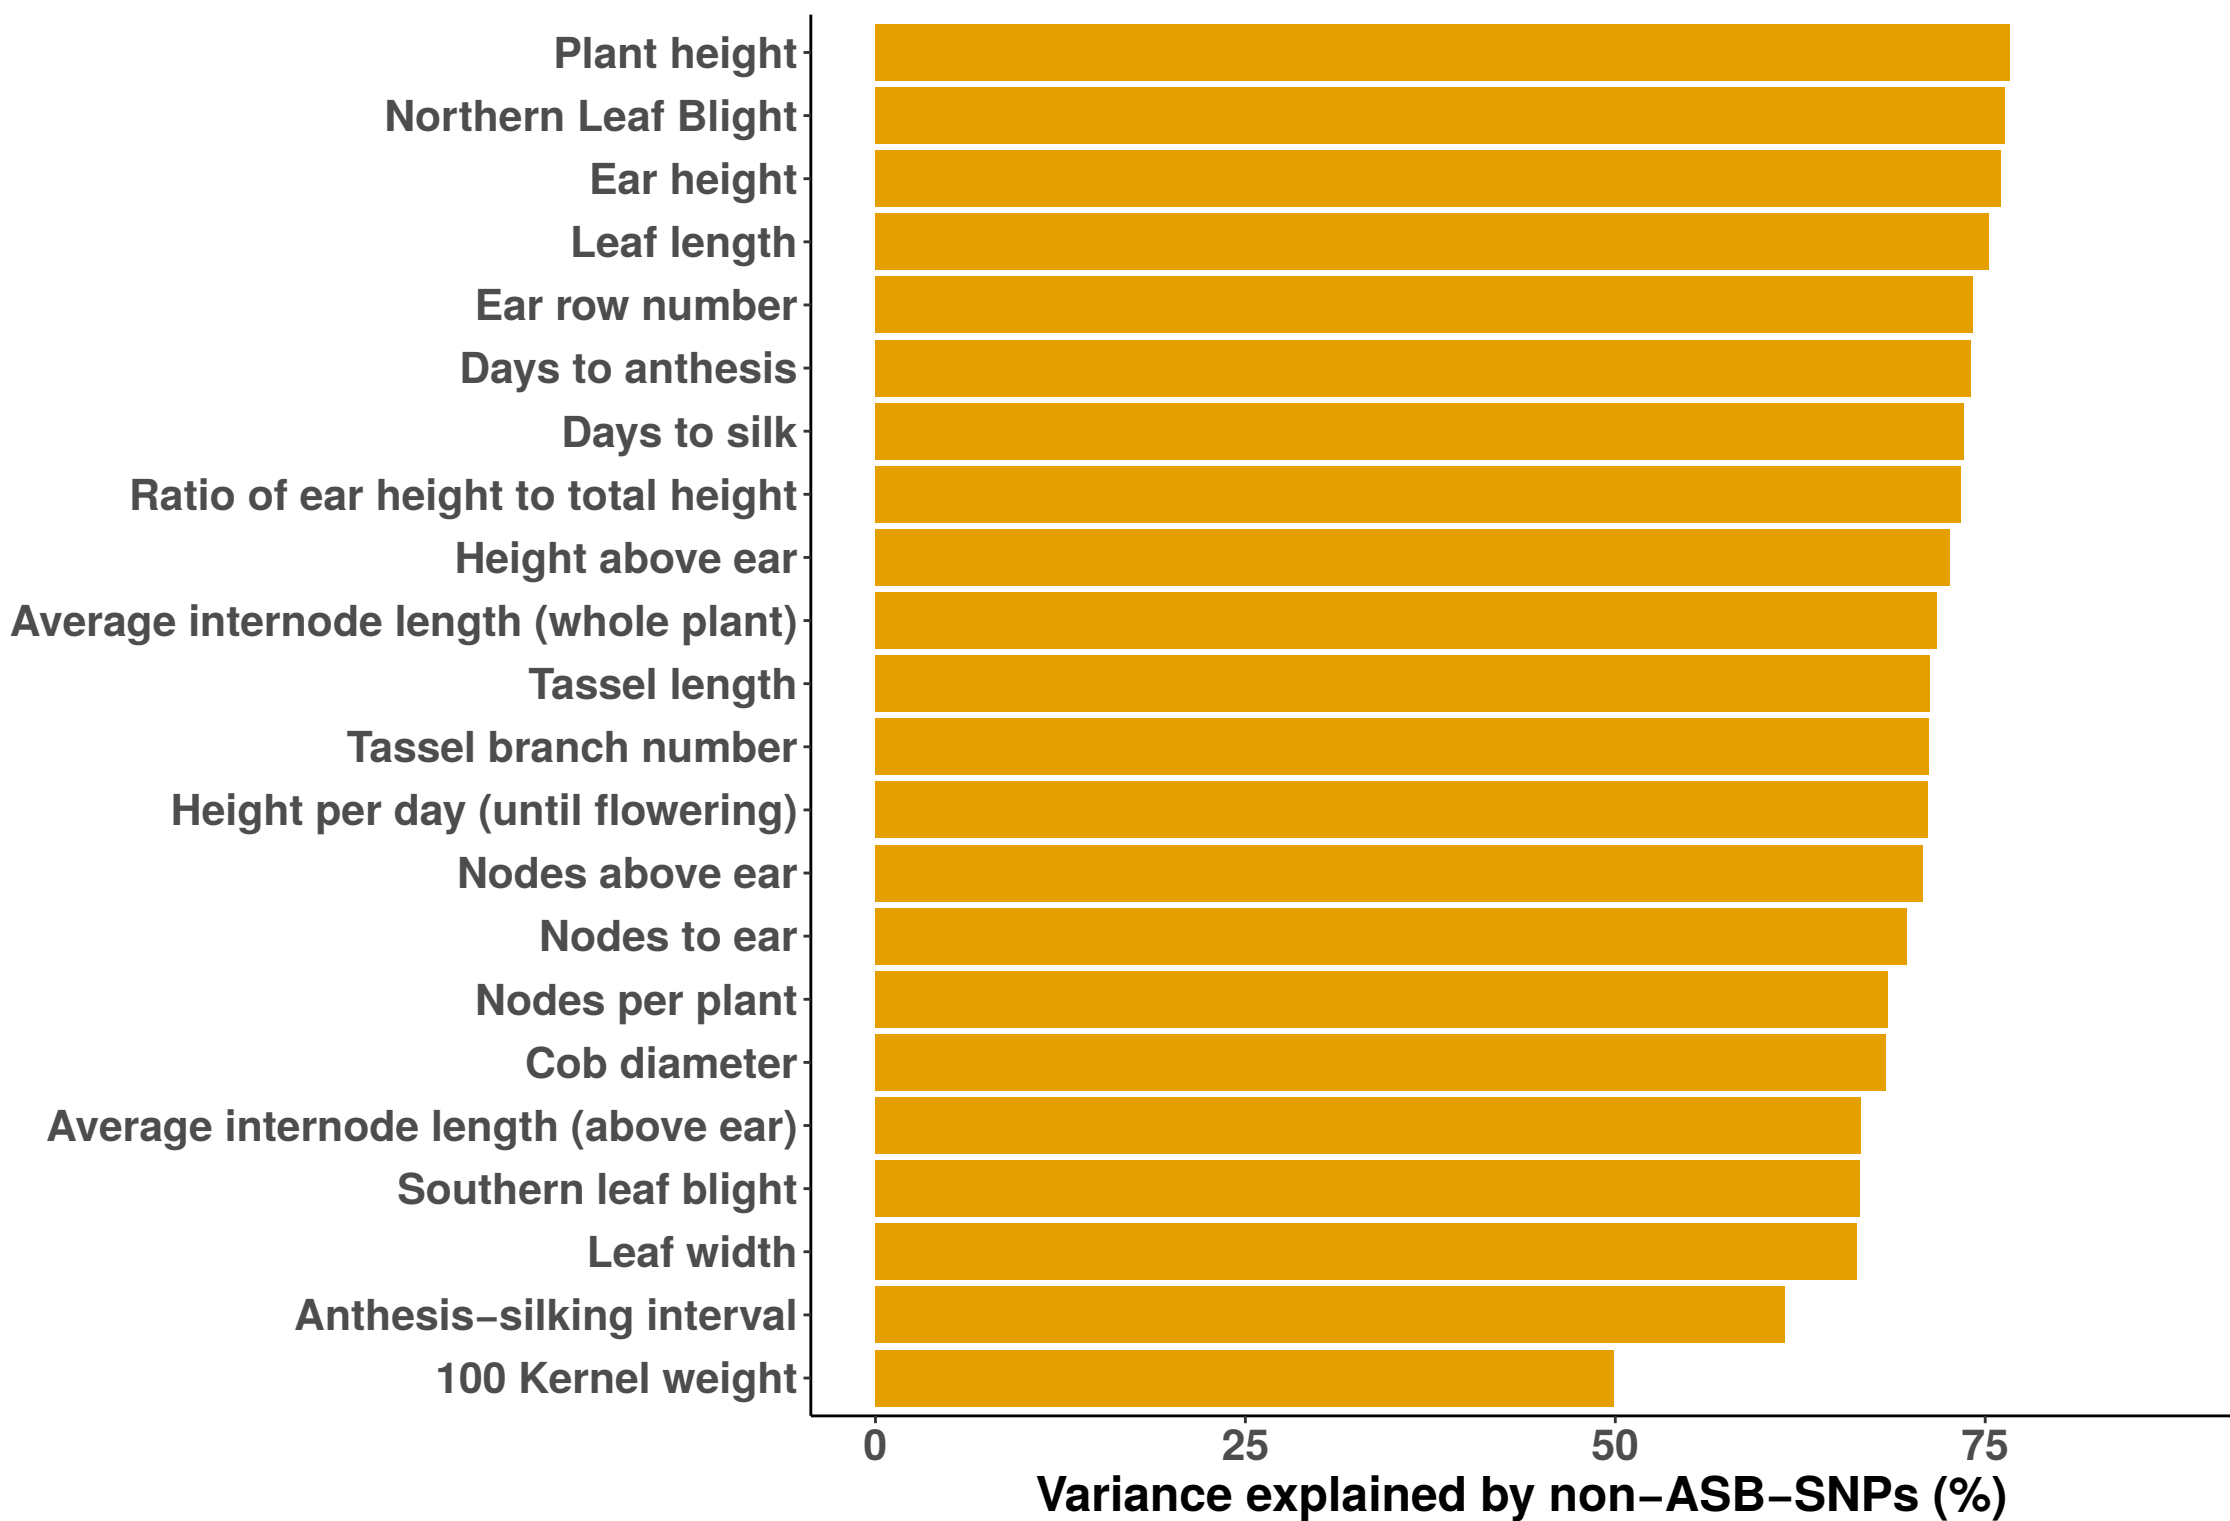

Supplement: Supplementary file 1 [file d33dda6e43764e44736c28e4.pdf]
